# Supplementary material for: A mechanism for increased sensitivity of acute myeloid leukemia to mitotoxic drugs
Source: PubMed Central journal article supplement (PMC6692368; doi:10.1038/s41419-019-1851-3), 2019-08-13
Supplement: 41419_2019_1851_MOESM2_ESM.pdf [file 41419_2019_1851_MOESM2_ESM.pdf]

## Supplementary Tables

**Supplementary Table S1. List of mitocans and non-mitocans used for bioinformatics analysis.**

| <i>Mitocans</i>  | <i>Non-mitocans</i> |
|------------------|---------------------|
| Cytarabine       | Hydroxyurea         |
| Doxorubicin      | Fludarabine         |
| Paclitaxel       | BN-2629             |
| Etoposide        | E-7820              |
| Rapamycin        | Fulvestrant         |
| Vinorelbine      | Dasatinib           |
| Temsirolimus     | Pazopanib           |
| Arsenic trioxide | Afatinib            |
| Obatoclax        | Dolastatin 10       |
| Salinomycin      | Estramustine        |
| Staurosporine    | Midostaurin         |
| Simvastatin      | Testolactone        |
| Mitoxanthrone    | Valrubicin          |
| L-Asparaginase   | Fostamatinib        |

**Supplementary Table S2. List of cell lines included in the study.**

| Cell line | Cell line origin       | Disease                | Age | Sex | Prior treatment | Ploidy                         | Genetic mutations / rearrangements                                                         |
|-----------|------------------------|------------------------|-----|-----|-----------------|--------------------------------|--------------------------------------------------------------------------------------------|
| MV-4-11   | Peripheral blood       | Acute myeloid leukemia | 10  | M   | NA              | 2n=48 (hyperdiploid)           | FLT3-ITD <sup>1</sup> , t(4;11) <sup>2</sup> [PMID: 12529668]                              |
| OCI-AML2  | Peripheral blood       | Acute myeloid leukemia | 65  | M   | NA              | Hyperdiploid 48(43-49)         | <i>DNMT3A</i> [PMID: 21904384]                                                             |
| THP-1     | Peripheral blood       | Acute myeloid leukemia | 1   | M   | NA              | Near-diploid (46, XY)          | <i>MLL-AF9</i> fusion, deletions in <i>CDKN2A</i> , <i>PTEN</i> [PMID: 11066077, 19635138] |
| MOLM-13   | Peripheral blood       | Acute myeloid leukemia | 20  | M   | NA              | Hyperdiploid 51(48-52)         | FLT3-ITD, CBL deltaExon8 mutant, <i>MLL-AF9</i> fusion [PMID: 12529668; 9305600]           |
| U251      | Central nervous system | Glioblastoma           | 75  | M   | NA              | 2n=46                          | <i>CDKN2A</i> , <i>C9orf53</i> , <i>PTEN</i> , <i>TP53</i> [PMID: 24810477; 17088437]      |
| SKOV3     | Ovary                  | Adeno-carcinoma        | 64  | F   | Thiotepa        | Hypodiploid (42-45)            | <i>TP53</i> , <i>CDKN2A</i> , <i>PIK3CA</i> , <i>APC</i> [PMID: 26585234; 17088437]        |
| OVCAR3    | Ovary                  | Adeno-carcinoma        | 60  | F   | CyPh/CsPt/Adr   | Aneuploid, near-triploid 69+/- | <i>TP53</i> [PMID: 17088437]                                                               |

<sup>1</sup> internal tandem duplication

<sup>2</sup> chromosomal translocation

**Supplementary Table S3. Basic characteristics of the patients, enrolled in the study.**

| N   | PB/BM <sup>1</sup> | age | sex | WBC  | % blast | Pretreatment                                                  | Mutation status: gene mutations/genetic rearrangements | Karyotype                                                                                                                                                          |
|-----|--------------------|-----|-----|------|---------|---------------------------------------------------------------|--------------------------------------------------------|--------------------------------------------------------------------------------------------------------------------------------------------------------------------|
| 1.  | PB                 | 29  | F   | 4.6  | 36      | Decitabine, Venetoclax, Dasatinib                             | PTPN11, CSF3R                                          | 48,XX,-11,del(17)(p12),+r,+2mar[2]/49,idem,+8[12]/48~50,XX,t(7;11)(q22;q24),+8,del(9)(q13q22),-11,del(17)(p12),+r,+2~3mar[cp6]                                     |
| 2.  | PB                 | 83  | M   | 15.6 | 30      | ONC201, Cytarabine                                            | TERT, CSF3R, TP53, GATA2                               | 45,XY,t(3;8)(q25;q22),-5,del(7)(q22q34),add(8)(q24.1),del(12)(p11.2),16,+mar[18]/46~49,idem,+del(7)(q22q34)[cp2]                                                   |
| 3.  | PB                 | 35  | F   | 23.2 | 62      | Decitabine                                                    | ASXL1, ASXL2, NRAS, RUNX1, FLT3 ITD, PHF6              | 46, XX                                                                                                                                                             |
| 4.  | PB                 | 53  | M   | 2.1  | 63      | DCLL9718S                                                     | KMT2A, U2AF1                                           | 46,XY,add(1)(p36.1),del(7)(q22q34),del(20)(q11.2q13.3)[19]/47,idem,+del(7)(q22q34)[1]                                                                              |
| 5.  | PB                 | 41  | F   | 13.5 | 92      | Hydroxyurea, Crenolanib, Decitabine, Venetoclax, Gilteritinib | TET2, FLT3 ITD                                         | 49,XX,+4,t(6;9)(p22;q34),+8,+15,del(15)(q11.2q21)x2[14]/48~50,idem,+13[cp6]                                                                                        |
| 6.  | PB                 | 77  | M   | 4.9  | 57      | Azacitidine, Cytarabine, Cladribine, Venetoclax               | TET2, SRSF2, RUNX1, CBL, IL7R                          | 46, XY                                                                                                                                                             |
| 7.  | PB                 | 32  | F   | 12.7 | 5.5     | No treatment                                                  | FLT3 ITD, NPM1, DNMT3A                                 | 46, XX                                                                                                                                                             |
| 8.  | PB                 | 57  | M   | 37.2 | 15      | Hydroxyurea. Cytarabine                                       | ASXL1, NRAS, TET2, RUNX1T1                             | 47,XY,+19[1]/47,idem,der(22)t(8;22)(q21.2;p11.2)[11]/46,XY[8]                                                                                                      |
| 9.  | PB                 | 79  | F   | 5.4  | 6       | IMGN622                                                       | ASXL, BCOR, DNMT3A                                     | 46,XX,t(2;17)(p14;q12),add(10)(q24),del(21)(q22q22)[19]/46,XX[1]                                                                                                   |
| 10. | BM                 | 80  | M   | 128  | 89      | Hydroxyurea                                                   | FLT3 ITD, RUNX1 ISH2, PIGA, DNMT3A, ZRSR2              | 46, XY                                                                                                                                                             |
| 11. | BM                 | 57  | M   | 9.3  | 86      | No treatment                                                  | SMC1A, SRSF2, IDH1, ASXL2, FLT3 ITD                    | 47,XY,+8[3]/46,XY,add(5)(q35)[2]/48,XY,+8,+mar[7]/47,XY,add(5)(q35),+8[6]/48,XY,add(5)(q35),+8,+mar[1]/49,XY,+8,+2mar[1]                                           |
| 12. | PB                 | 64  | M   | 3.1  | 67      | Decitabine                                                    | TET2, TP53, EZH2, CBL                                  | 41~45,Y,der(X)t(X;1)(q24;p13),-2,add(3)(p13),del(5)(q13q35),-8,psudic(9;10)(p22;p11.2),-15,-17,add(17)(p11.2),add(21)(p11.2),del(22)(q11.2),+2~6mar[cp19]/46,XY[1] |
| 13. | PB                 | 58  | M   | 38   | 31      | No treatment                                                  | ETV6, EZH2, NRAS, SETBP1, DNMT3A                       | 46, XY                                                                                                                                                             |
| 14. | PB                 | 70  | M   | 8.2  | 48      | No treatment                                                  | KDM6A, RUNX1, TP53                                     | 46~47,XY,+1,der(1;10)(q10;q10),der(1;12)(p10;q10),del(5)(q11.2),del(6)(q15q25),-14,-16,add(16)(p11.2),-17,-21,+3~6mar[cp15]/46,XY[4]                               |
| 15. | BM                 | 89  | M   | 95.8 | 65      | No treatment                                                  | ASXL1, CBL, CREBBP, PHF6, TET2                         | 50,XY,+der(1;11)(q10;q10),+8,+8,+8[10]/47~51,XY,+add(1)(p13),+8,+8,+8,der(9)t(1;9)(q21;p24)[cp10]                                                                  |
| 16. | BM                 | 58  | M   | 38   | 31      | No treatment                                                  | ETV6, EZH2, NRAS, SETBP1, DNMT3A                       | 46, XY                                                                                                                                                             |
| 17. | PB                 | 64  | M   | 9.2  | 23      | Dasatinib, Decitabine, Venetoclax                             | ASXL1                                                  | 46,XY,add(2)(q12),t(4;12)(q12;q24.1),ins(12;?)(p13;?)[18]/46,XY[2]                                                                                                 |

|     |    |    |   |     |    |                                            |                                          |                                                                  |
|-----|----|----|---|-----|----|--------------------------------------------|------------------------------------------|------------------------------------------------------------------|
| 18. | PB | 72 | M | 5.2 | 90 | AMG 330,<br>Tocilizumab,<br>Hydrea         | BCOR, U2AF1,<br>DNMT3A                   | 46, XY                                                           |
| 19. | PB | 21 | M | 4.8 | 86 | Decitabine,<br>Venetoclax,                 | NPM1, IDH2                               | 46,XY,t(2;4)(p23;q21)[3]/46,XY,t(5;17)(q13;q25)<br>[2]/46,XY[15] |
| 20. | PB | 30 | M | 2.3 | 61 | Mitoxantrone,<br>Etoposide,<br>Cytarabine  | BCOR, PTPN11                             | 45,XX,t(3;3)(q21;q26.2),del(6)(q12),-7[16]                       |
| 21. | PB | 72 | M | 1.4 | 38 | Hydroxyurea,<br>Quizartinib,<br>Decitabine | CEBPA, FLT3 ITD,<br>KRAS, PTPN11,<br>WT1 | 46, XY                                                           |

<sup>1</sup> Source of primary AML cells: PB (peripheral blood) / BM (bone marrow).

**Supplementary Table S4. Primer sequences used for qPCR studies.**

| Locus                                                                           | Forward (5'-3')        | Reverse (5'-3')       | PCR protocol                                                                                     |
|---------------------------------------------------------------------------------|------------------------|-----------------------|--------------------------------------------------------------------------------------------------|
| <i>Primers used for estimation of relative mtDNA content (mtDNA/gDNA ratio)</i> |                        |                       | I. 95 °C for 30 s;<br>II.<br>1. 95 °C for 10 s;<br>2. 55 °C for 45 s;<br>+Plate read (40 cycles) |
| <i>GAPDH</i>                                                                    | TCTGACTTCAACAGCGACAC   | CAGCCACATACCAGGAAATG  |                                                                                                  |
| <i>B2M</i>                                                                      | TGTAAGCAGCATCATGGAGG   | CTCCACATAGTGAGGGTTATC |                                                                                                  |
| <i>TBP</i>                                                                      | GAGAGTTCTGGGATTGTACC   | CCATCTGAAAACAGAGCAGG  |                                                                                                  |
| <i>ACTB</i>                                                                     | AAAGACCTGTACGCCAACAC   | GGAAAGACACCCACCTTGAT  |                                                                                                  |
| <i>ND1</i>                                                                      | GTATTATACCCACACCCACC   | GTACAATGAGGAGTAGGAGG  |                                                                                                  |
| <i>ND4</i>                                                                      | CACATATGGCCTAGACTACG   | GTGGGTGGTTGTGTTGATTC  |                                                                                                  |
| <i>Primers used for gene expression studies</i>                                 |                        |                       | III. Melt Curve 65 to 95 °C, increment 0.5 °C for 5 s<br>+Plate read<br>END                      |
| <i>MFN1</i>                                                                     | TCTCCGCCTTTAACTTCTCG   | TTATGCTAAGTCTCCGCTCC  |                                                                                                  |
| <i>MFN2</i>                                                                     | GCAGGACATGATAGATGGCT   | ATAGTTGAGGGAGAAGCACTG |                                                                                                  |
| <i>OPA1</i>                                                                     | GTCAGTCAAATGGACCCTCA   | ATCTGCTGAATCCTGCTTGG  |                                                                                                  |
| <i>DNML1</i>                                                                    | GAACAGCGAGATTGTGAGGTT  | TGCATTACTGCCTTTGGCAC  |                                                                                                  |
| <i>FIS1</i>                                                                     | ATCCGTAAAGGCATCGTGCT   | AGAAGACGTAATCCCGCTGT  |                                                                                                  |
| <i>MFF</i>                                                                      | ACCTGACTGTTGTAGATGCAG  | AGCACGTTCTTTGTTCTCCTC |                                                                                                  |
| <i>MID49</i>                                                                    | GTGAAGCGGTTTCATTGACAG  | TTGAGCAGGCTCAGTTCCTT  |                                                                                                  |
| <i>MID51</i>                                                                    | ATGTACTTGAGTGGCAGCCT   | GGGCACAATGAGTTGGATGT  |                                                                                                  |
| <i>ACTB</i>                                                                     | GATCAAGATCATTGCTCCTCTG | ATACTCCTGCTTGCTGATCCA |                                                                                                  |

**Supplementary Table S5. Results of multiple linear regression: association of cancer type with the sensitivity to mitocan treatment.**

| Dependent variable <sup>1</sup>                                                    | B-coefficient | SE(B) | <i>p</i> -value |
|------------------------------------------------------------------------------------|---------------|-------|-----------------|
| <i>After adjustment for age, gender and prior treatment of the cell line donor</i> |               |       |                 |
| Mitocan activity Z-scores                                                          | 0.382         | 0.168 | <b>0.031</b>    |
| Non-mitocan activity Z-scores                                                      | 0.346         | 0.171 | 0.054           |

<sup>1</sup> With cancer type as an independent predictor  
 $p < 0.05$  are highlighted in bold

**Supplementary Table S6. Fold changes (positive – increase; negative – decrease) of mitochondrial and bioenergetic parameters after doxorubicin treatment (DOX/untreated).**

| Cell line | mtDNA content | MTG fluorescence | JC-1, red/green | ATP content   | Basal OCR    | ATP-linked OCR | Proton leak  | Spare capacity | Coupling efficiency | ECAR         | WB (ATP syn β) | LD50 (DOX), μM |
|-----------|---------------|------------------|-----------------|---------------|--------------|----------------|--------------|----------------|---------------------|--------------|----------------|----------------|
| MV-4-11   | <b>-1.49</b>  |                  |                 | <b>-19.71</b> | <b>-2.19</b> | <b>-2.84</b>   | -1.94        | -1.10          | -1.43               | 1.22         |                | 1.634          |
| OCI-AML2  | <b>-1.44</b>  |                  |                 | <b>-26.80</b> | <b>-2.02</b> | <b>-3.26</b>   | -1.28        | <b>-4.26</b>   | <b>-2.22</b>        | -1.03        |                | 21.67          |
| MOLM-13   | <b>-1.77</b>  | <b>-32.03</b>    | <b>-63.96</b>   | <b>-9.57</b>  | <b>-3.11</b> | <b>-6.29</b>   | -1.23        | <b>-5.95</b>   | <b>-2.16</b>        | -1.10        | 1.118          | 26.75          |
| THP-1     | <b>-1.40</b>  |                  |                 | <b>-5.66</b>  | <b>-5.32</b> | <b>-9.26</b>   | <b>-3.30</b> | <b>-3.80</b>   | <b>-2.36</b>        | <b>-1.92</b> |                | 68.70          |
| PBMC      | 1.40          | <b>-13.97</b>    | <b>-4.71</b>    | <b>-8.76</b>  | <b>-1.55</b> | <b>-1.61</b>   | -1.41        | <b>-2.23</b>   | -1.20               | <b>-1.52</b> | <b>3.772</b>   | 40.85          |
| U251      | <b>5.51</b>   |                  |                 | -1.05         |              |                |              |                |                     |              |                | 122.22         |
| SKOV3     | <b>2.37</b>   | <b>-29.19</b>    | <b>-15.34</b>   | 1.07          | -1.28        | -1.26          | -1.03        | <b>-1.90</b>   | -1.07               | 1.09         | 1.002          | 110.82         |
| OVCAR3    | <b>5.59</b>   |                  |                 | 1.05          |              |                |              |                |                     |              |                | 93.87          |

Cases with p<0.05 are in **bold**.

**Supplementary Table S7. Fold change differences in expression of fusion and fission genes in DOX-treated (LD50, 8 h) cells compared to untreated cells.**

| Gene<br>Cell line | Fusion            |                   |                  | Fission          |                  |                  |                     |                   |
|-------------------|-------------------|-------------------|------------------|------------------|------------------|------------------|---------------------|-------------------|
|                   | <i>MFN1</i>       | <i>MFN2</i>       | <i>OPAI</i>      | <i>DNM1L</i>     | <i>FIS1</i>      | <i>MFF</i>       | <i>MID49</i>        | <i>MID51</i>      |
| MV-4-11           | 0.83 (0.50-1.37)* | 2.13 (1.34-3.39)  | 1.35 (0.84-2.18) | 2.06 (1.26-3.36) | 3.06 (1.88-4.99) | 1.99 (1.19-3.34) | 5.71 (3.52-9.27)    | 2.86 (1.69-4.85)  |
| MOLM-13           | 1.09 (0.53-2.26)  | 2.19 (0.76-6.32)  | 0.51 (0.25-1.03) | 0.58 (0.24-1.38) | 0.80 (0.30-2.12) | 0.53 (0.28-1.01) | 16.82 (4.96-56.95)  | 1.41 (0.42-4.71)  |
| THP-1             | 5.43 (3.71-7.95)  | 6.95 (3.61-13.37) | 0.71 (0.52-0.98) | 0.36 (0.13-0.99) | 1.84 (1.26-2.69) | 0.66 (0.48-0.92) | 32.98 (15.96-68.15) | 3.14 (1.78-5.54)  |
| PBMC              | 3.09 (1.11-8.63)  | 4.82 (1.18-19.67) | 1.29 (0.47-3.59) | 0.91 (0.45-1.84) | 1.52 (0.74-3.10) | 2.24 (1.04-4.84) | 13.67 (2.79-67.09)  | 4.72 (1.08-20.68) |
| SKOV3             | 0.33 (0.11-0.95)  | 0.67 (0.51-0.86)  | 0.46 (0.17-1.21) | 0.52 (0.18-1.51) | 0.93 (0.72-1.21) | 0.63 (0.35-1.12) | 0.58 (0.37-0.89)    | 0.25 (0.21-0.30)  |

\* Fold changes were calculated using the comparative  $\Delta\Delta C_t$  method



**Supplementary Table S8. Relative potency of drugs used for combination studies (single-ray design) in cell lines and primary AML samples.**

| Cell line/Patient sample                                       | LD25 <sub>1st drug</sub> / LD25 <sub>2nd drug</sub> =<br>Relative potency | Fixed ratio (50:50) concentrations<br>of the 1 <sup>st</sup> drug, 2 <sup>nd</sup> drug                        |
|----------------------------------------------------------------|---------------------------------------------------------------------------|----------------------------------------------------------------------------------------------------------------|
| <i>2-DG (1<sup>st</sup> drug) / CCCP (2<sup>nd</sup> drug)</i> |                                                                           |                                                                                                                |
| MV-4-11                                                        | 7500 $\mu$ M / 2.07 $\mu$ M = 3623                                        | 10.7 mM, 3 $\mu$ M; 7.5 mM, 2.1 $\mu$ M;<br>3.6 mM, 1 $\mu$ M                                                  |
| OCI-AML2                                                       | 16240 $\mu$ M / 15.63 $\mu$ M = 1039                                      | 16.2 mM, 15.6 $\mu$ M; 8.1 mM, 7.8 $\mu$ M;<br>6.55 mM, 6.3 $\mu$ M                                            |
| MOLM-13                                                        | 51600 $\mu$ M / 6.3 $\mu$ M = 8190                                        | 51.6 mM, 6.3 $\mu$ M; 41 mM, 5 $\mu$ M.                                                                        |
| THP-1                                                          | 74800 $\mu$ M / 4.06 $\mu$ M = 18424                                      | 74.8 mM, 4.1 $\mu$ M; 36.8 mM, 2 $\mu$ M;<br>18.4 mM, 1 $\mu$ M                                                |
| PBMC                                                           | 106000 $\mu$ M / 45.41 $\mu$ M = 2334                                     | 106 mM, 45.41 $\mu$ M; 70 mM, 30 $\mu$ M;<br>46.7 mM, 20 $\mu$ M; 23.3 mM, 10 $\mu$ M                          |
| U251                                                           | 616150 $\mu$ M / 92.3 $\mu$ M = 6676                                      | 616.15 mM, 92.3 $\mu$ M; 467.3 mM, 70 $\mu$ M;<br>333.8 mM, 50 $\mu$ M                                         |
| SKOV3                                                          | 737000 $\mu$ M / 133.4 $\mu$ M = 5525                                     | 800 mM, 139 $\mu$ M; 737 mM, 133.4 $\mu$ M;<br>688.9 mM, 120 $\mu$ M                                           |
| OVCAR3                                                         | 390748 $\mu$ M / 130.3 $\mu$ M = 2999                                     | 450 mM, 150 $\mu$ M; 390.7 mM, 130.3 $\mu$ M;<br>300 mM, 100 $\mu$ M; 150 mM, 50 $\mu$ M;<br>30 mM, 10 $\mu$ M |
| AML 1                                                          | 8660 $\mu$ M / 12.33 $\mu$ M = 702                                        | 8.66 mM, 12.33 $\mu$ M; 5.77 mM, 8.22 $\mu$ M;<br>2.87 mM, 4.11 $\mu$ M                                        |
| AML 2                                                          | 79100 $\mu$ M / 16.07 $\mu$ M = 4922                                      | 79 mM, 16.07 $\mu$ M; 50 mM, 10 $\mu$ M;<br>24.5 mM, 5 $\mu$ M                                                 |
| AML 3                                                          | 80700 $\mu$ M / 11.4 $\mu$ M = 7079                                       | 80.7 mM, 11.4 $\mu$ M; 53 mM, 7.5 $\mu$ M;<br>25 mM, 3.5 $\mu$ M                                               |
| AML 4                                                          | 66200 $\mu$ M / 7.7 $\mu$ M = 8597                                        | 66.2 mM, 7.7 $\mu$ M; 43 mM, 5 $\mu$ M;<br>21.5 mM, 2.5 $\mu$ M                                                |
| AML 5                                                          | 80900 $\mu$ M / 8.3 $\mu$ M = 9747                                        | 80.9 mM, 8.3 $\mu$ M; 57.8 mM, 6 $\mu$ M;<br>40.5 mM, 4 $\mu$ M; 19.5 mM, 2 $\mu$ M                            |
| AML 6                                                          | 3700 $\mu$ M / 2.6 $\mu$ M = 1423                                         | 3.7 mM, 2.6 $\mu$ M; 2.9 mM, 2 $\mu$ M;<br>1.4 mM, 1 $\mu$ M                                                   |
| AML 7                                                          | 23800 $\mu$ M / 17.4 $\mu$ M = 1368                                       | 23.8 mM, 17.4 $\mu$ M; 13.7 mM, 10 $\mu$ M;<br>6.8 mM, 5 $\mu$ M                                               |
| AML 8                                                          | 58900 $\mu$ M / 23.8 $\mu$ M = 2475                                       | 58.9 mM, 23.8 $\mu$ M; 36.8 mM, 15 $\mu$ M;<br>24.5 mM, 10 $\mu$ M; 12.3 mM, 5 $\mu$ M                         |
| AML 9                                                          | 268000 $\mu$ M / 13.5 $\mu$ M = 19852                                     | 268 mM, 13.5 $\mu$ M; 198.5 mM, 10 $\mu$ M;<br>99.3 mM, 5 $\mu$ M; 19.9 mM, 1 $\mu$ M                          |
| AML 10                                                         | 58800 $\mu$ M / 2.23 $\mu$ M = 26368                                      | 58.8 mM, 2.23 $\mu$ M; 26.4 mM, 1 $\mu$ M;<br>13.2 mM, 0.5 $\mu$ M                                             |
| AML 11                                                         | 4800 $\mu$ M / 14.5 $\mu$ M = 331                                         | 4.8 mM, 14.5 $\mu$ M; 2.4 mM, 7.25 $\mu$ M;<br>1.2 mM, 3.6 $\mu$ M                                             |
| AML 12                                                         | 56100 $\mu$ M / 10.33 $\mu$ M = 5431                                      | 56.1 mM, 10.3 $\mu$ M; 28.1 mM, 5.2 $\mu$ M;<br>14 mM, 2.6 $\mu$ M; 7 mM, 1.3 $\mu$ M                          |
| AML 13                                                         | 200700 $\mu$ M / 55.1 $\mu$ M = 3642                                      | 200 mM, 55.1 $\mu$ M; 100 mM, 27.6 $\mu$ M;<br>50 mM, 13.8 $\mu$ M                                             |
| AML 14                                                         | 43200 $\mu$ M / 39.6 $\mu$ M = 1091                                       | 43.2 mM, 39.6 $\mu$ M; 21.6 mM, 19.8 $\mu$ M;                                                                  |

|                                                                    |                                       |                                                                                                                        |
|--------------------------------------------------------------------|---------------------------------------|------------------------------------------------------------------------------------------------------------------------|
|                                                                    |                                       | 10.8 mM, 9.9 $\mu$ M                                                                                                   |
| AML 15                                                             | 7950 $\mu$ M / 70.2 $\mu$ M = 113     | 8 mM, 70 $\mu$ M; 4 mM, 35 $\mu$ M;<br>2 mM, 17.5 $\mu$ M; 1 mM, 8.75 $\mu$ M                                          |
| AML 16                                                             | 95700 $\mu$ M / 17 $\mu$ M = 5629     | 95.7 mM, 17 $\mu$ M; 47.9 mM, 8.5 $\mu$ M;<br>23.9 mM, 4.25 $\mu$ M; 12 mM, 2.13 $\mu$ M                               |
| AML 17                                                             | 81000 $\mu$ M / 16.7 $\mu$ M = 4850   | 81 mM, 16.7 $\mu$ M; 40.5 mM, 8.35 $\mu$ M;<br>20.25 mM, 4.18 $\mu$ M; 10.1 mM, 2.1 $\mu$ M                            |
| AML 18                                                             | 10300 $\mu$ M / 4 $\mu$ M = 2575      | 10.3 mM, 4 $\mu$ M; 2.6 mM, 1 $\mu$ M;<br>1.3 mM, 0.5 $\mu$ M                                                          |
| AML 19                                                             | 18200 $\mu$ M / 0.55 $\mu$ M = 33091  | 18.2 mM, 0.55 $\mu$ M; 12.1 mM, 0.37 $\mu$ M;<br>9.1 mM, 0.28 $\mu$ M; 4.55 mM, 0.13 $\mu$ M;<br>2.28 mM, 0.07 $\mu$ M |
| AML 20                                                             | 850 $\mu$ M / 2.18 $\mu$ M = 390      | 0.85 mM, 2.2 $\mu$ M; 0.425 mM, 1.1 $\mu$ M;<br>0.2 mM, 0.55 $\mu$ M; 0.1 mM, 0.27 $\mu$ M                             |
| AML 21                                                             | 105300 $\mu$ M / 22.8 $\mu$ M = 4618  | 105.3 mM, 22.8 $\mu$ M; 52.7 mM, 11.4 $\mu$ M;<br>26.3 mM, 5.7 $\mu$ M                                                 |
| <i>CCCCP (1<sup>st</sup> drug) / ABT-199 (2<sup>nd</sup> drug)</i> |                                       |                                                                                                                        |
| OCI-AML2                                                           | 15.63 $\mu$ M / 0.177 $\mu$ M = 88    | 15.63 $\mu$ M, 0.177 $\mu$ M; 10 $\mu$ M, 0.113 $\mu$ M;<br>5 $\mu$ M, 0.06 $\mu$ M; 1 $\mu$ M, 0.0113 $\mu$ M         |
| PBMC                                                               | 45.41 $\mu$ M / 0.6 $\mu$ M = 76      | 45.1 $\mu$ M, 0.6 $\mu$ M; 30 $\mu$ M, 0.4 $\mu$ M;<br>20 $\mu$ M, 0.26 $\mu$ M; 10 $\mu$ M, 0.13 $\mu$ M              |
| <i>2-DG (1<sup>st</sup> drug) / ABT-199 (2<sup>nd</sup> drug)</i>  |                                       |                                                                                                                        |
| OCI-AML2                                                           | 16240 $\mu$ M / 0.177 $\mu$ M = 91751 | 16.24 mM, 0.177 $\mu$ M; 13.8 mM, 0.15 $\mu$ M;<br>9.2 mM, 0.1 $\mu$ M; 1.8 mM, 0.02 $\mu$ M                           |
| PBMC                                                               | 106000 $\mu$ M / 0.6 $\mu$ M = 176667 | 106 mM, 0.6 $\mu$ M; 53 mM, 0.3 $\mu$ M;<br>26.5 mM, 0.15 $\mu$ M; 10.6 mM, 0.06 $\mu$ M                               |
| <i>2-DG (1<sup>st</sup> drug) / ara-C (2<sup>nd</sup> drug)</i>    |                                       |                                                                                                                        |
| OCI-AML2                                                           | 16240 $\mu$ M / 77.8 $\mu$ M = 209    | 16.2 mM, 77.8 $\mu$ M; 8.1 mM, 38.9 $\mu$ M;<br>4.1 mM, 19.5 $\mu$ M; 2 mM, 9.7 $\mu$ M                                |
| AML 11 <sup>1</sup>                                                | 4800 $\mu$ M / 53.4 $\mu$ M = 90      | 4.8 mM, 53.4 $\mu$ M; 2.4 mM, 26.7 $\mu$ M;<br>1.2 mM, 13.4 $\mu$ M                                                    |
| AML 13                                                             | 200700 $\mu$ M / 131.8 $\mu$ M = 1523 | 200 mM, 131.8 $\mu$ M; 100 mM, 69.1 $\mu$ M;<br>50 mM, 34.5 $\mu$ M                                                    |
| AML 14                                                             | 43150 $\mu$ M / 400 $\mu$ M = 108     | 43.2 mM, 400 $\mu$ M; 21.6 mM, 200 $\mu$ M;<br>10.8 mM, 100 $\mu$ M                                                    |
| AML 15                                                             | 7950 $\mu$ M / 50.4 $\mu$ M = 158     | 8 mM, 50 $\mu$ M; 4 mM, 25 $\mu$ M;<br>2 mM, 12.5 $\mu$ M; 1 mM, 6.25 $\mu$ M                                          |
| AML 20                                                             | 850 $\mu$ M / 141.2 $\mu$ M = 6       | 0.85 mM, 141.2 $\mu$ M; 0.425 mM, 70.6 $\mu$ M;<br>0.2 mM, 35.3 $\mu$ M; 0.1 mM, 17.7 $\mu$ M                          |

<sup>1</sup> Only primary AML samples, not resistant to ara-C (LD25 < 400  $\mu$ M corresponding to 0.4% DMSO), have been treated with combination of ara-C and 2-DG.

**Supplementary Table S9. Results of multiple linear regression: no association of pretreatment of the patients (n = 21) with mean combination indices of CCCP/2-DG.**

| Dependent variable <sup>1</sup>                                                     | B-coefficient | SE(B) | p-value |
|-------------------------------------------------------------------------------------|---------------|-------|---------|
| <i>Before adjustment for age, gender, source of primary cells and % blast cells</i> |               |       |         |
| Mean combination index based on LD25, 50, 75 of the mixture CCCP/2DG                | -0.085        | 0.118 | 0.481   |
| <i>After adjustment for age, gender, source of primary cells and % blast cells</i>  |               |       |         |
| Mean combination index based on LD25, 50, 75 of the mixture CCCP/2DG                | 0.002         | 0.153 | 0.988   |

<sup>1</sup> With pretreatment (0 / 1) as an independent predictor

**Supplementary Table S10. Correlations between mitochondrial parameters across untreated AML cells, healthy blood cells and SKOV3 cell line<sup>1</sup>.**

|                                 |          | Max OCR      | ATP-linked OCR | Spare capacity | Coupling efficiency | LD25, CCCP   | LD25, 2-DG   | CI based on LD50 of the mixture | Mean CI based on LD25,50,75 of the mixture |
|---------------------------------|----------|--------------|----------------|----------------|---------------------|--------------|--------------|---------------------------------|--------------------------------------------|
| Basal OCR                       | <i>r</i> | <b>0.915</b> | <b>0.975</b>   | 0.790          | 0.189               | 0.345        | 0.565        | 0.521                           | 0.283                                      |
|                                 | <i>p</i> | <b>0.011</b> | <b>0.001</b>   | 0.061          | 0.719               | 0.500        | 0.243        | 0.289                           | 0.587                                      |
| Max OCR                         | <i>r</i> |              | <b>0.966</b>   | <b>0.969</b>   | 0.477               | 0.463        | 0.644        | 0.579                           | 0.397                                      |
|                                 | <i>p</i> |              | <b>0.002</b>   | <b>0.001</b>   | 0.338               | 0.355        | 0.168        | 0.229                           | 0.436                                      |
| ATP-linked OCR                  | <i>r</i> |              |                | <b>0.888</b>   | 0.376               | 0.500        | 0.694        | 0.639                           | 0.424                                      |
|                                 | <i>p</i> |              |                | <b>0.018</b>   | 0.463               | 0.312        | 0.126        | 0.172                           | 0.402                                      |
| Spare capacity                  | <i>r</i> |              |                |                | 0.651               | 0.550        | 0.687        | 0.61                            | 0.481                                      |
|                                 | <i>p</i> |              |                |                | 0.161               | 0.258        | 0.132        | 0.199                           | 0.335                                      |
| Coupling efficiency             | <i>r</i> |              |                |                |                     | <b>0.840</b> | 0.784        | 0.749                           | <b>0.821</b>                               |
|                                 | <i>p</i> |              |                |                |                     | <b>0.036</b> | 0.065        | 0.087                           | <b>0.045</b>                               |
| LD25, CCCP                      | <i>r</i> |              |                |                |                     |              | <b>0.969</b> | <b>0.907</b>                    | <b>0.893</b>                               |
|                                 | <i>p</i> |              |                |                |                     |              | <b>0.001</b> | <b>0.012</b>                    | <b>0.017</b>                               |
| LD25, 2-DG                      | <i>r</i> |              |                |                |                     |              |              | <b>0.943</b>                    | <b>0.869</b>                               |
|                                 | <i>p</i> |              |                |                |                     |              |              | <b>0.005</b>                    | <b>0.025</b>                               |
| CI based on LD50 of the mixture | <i>r</i> |              |                |                |                     |              |              |                                 | <b>0.960</b>                               |
|                                 | <i>p</i> |              |                |                |                     |              |              |                                 | <b>0.002</b>                               |

<sup>1</sup> Correlations defined by two-tailed Pierson correlation coefficient *r*; *p* defines *p*-value. Significant correlations (*p*<0.05) are in bold.

**Supplementary Table S11. Changes in mitochondrial bioenergetic parameters after treatment with mitocans (CCCP, DOX, LD50), glycolysis inhibitor (2-DG, LD50), or their combination (CCCP and 2-DG, LD25) in a panel of cells.**

| Drug                    | Bioenergetic parameter | MV-4-11                      | OCI-AML2                     | MOLM-13                      | THP-1                        | PBMC                         | SKOV3                        |
|-------------------------|------------------------|------------------------------|------------------------------|------------------------------|------------------------------|------------------------------|------------------------------|
| CCCP, LD50              | Basal OCR              | $p < 0.0001$<br><b>-74%</b>  | $p < 0.0001$<br><b>-92%</b>  | $p < 0.0001$<br><b>-89%</b>  | $p < 0.0001$<br><b>-96%</b>  | NS                           | $p < 0.0001$<br><b>-79%</b>  |
|                         | Maximal OCR            | $p < 0.0001$<br><b>-67%</b>  | $p < 0.0001$<br><b>-96%</b>  | $p < 0.0001$<br><b>-96%</b>  | $p < 0.0001$<br><b>-98%</b>  | $p < 0.0001$<br><b>-88%</b>  | $p < 0.0001$<br><b>-88%</b>  |
|                         | ATP-linked OCR         | $p < 0.0001$<br><b>-101%</b> | $p < 0.0001$<br><b>-97%</b>  | $p < 0.0001$<br><b>-96%</b>  | $p < 0.0001$<br><b>-95%</b>  | $p = 0.0020$<br><b>-71%</b>  | $p < 0.0001$<br><b>-100%</b> |
|                         | Proton leak            | NS                           | $p < 0.0001$<br><b>-85%</b>  | $p < 0.0001$<br><b>-68%</b>  | $p < 0.0001$<br><b>-100%</b> | $p = 0.0034$<br><b>+147%</b> | NS                           |
|                         | Spare capacity         | $p = 0.0211$<br><b>-64%</b>  | $p < 0.0001$<br><b>-100%</b> | $p < 0.0001$<br><b>-100%</b> | $p < 0.0001$<br><b>-100%</b> | $p < 0.0001$<br><b>-105%</b> | $p < 0.0001$<br><b>-96%</b>  |
|                         | Coupling efficiency    | $p < 0.0001$<br><b>-116%</b> | $p = 0.0161$<br><b>-31%</b>  | $p = 0.0017$<br><b>-19%</b>  | $p < 0.0001$<br><b>-45%</b>  | $p = 0.0002$<br><b>-105%</b> | $p < 0.0001$<br><b>-129%</b> |
|                         | ECAR                   | NS                           | $p < 0.0047$<br><b>-19%</b>  | $p = 0.0001$<br><b>-49%</b>  | $p = 0.0004$<br><b>-57%</b>  | NS                           | NS                           |
| DOX, LD50               | Basal OCR              | $p < 0.0001$<br><b>-54%</b>  | $p = 0.0006$<br><b>-51%</b>  | $p < 0.0001$<br><b>-68%</b>  | $p = 0.0002$<br><b>-81%</b>  | $p = 0.0021$<br><b>-35%</b>  | NS                           |
|                         | Maximal OCR            | $p = 0.0108$<br><b>-30%</b>  | $p = 0.0007$<br><b>-62%</b>  | $p < 0.0001$<br><b>-77%</b>  | $p < 0.0001$<br><b>-77%</b>  | $p = 0.0097$<br><b>-52%</b>  | NS                           |
|                         | ATP-linked OCR         | $p < 0.0001$<br><b>-65%</b>  | $p = 0.0012$<br><b>-69%</b>  | $p = 0.0002$<br><b>-84%</b>  | $p = 0.0010$<br><b>-89%</b>  | $p = 0.0340$<br><b>-38%</b>  | NS                           |
|                         | Proton leak            | NS                           | NS                           | NS                           | $p = 0.0090$<br><b>-70%</b>  | NS                           | NS                           |
|                         | Spare capacity         | NS                           | $p = 0.0051$<br><b>-77%</b>  | $p = 0.0034$<br><b>-83%</b>  | $p = 0.0074$<br><b>-74%</b>  | $p = 0.0194$<br><b>-55%</b>  | $p = 0.0175$<br><b>-47%</b>  |
|                         | Coupling efficiency    | $p = 0.0062$<br><b>-30%</b>  | $p = 0.0119$<br><b>-55%</b>  | NS                           | $p = 0.0157$<br><b>-58%</b>  | NS                           | NS                           |
|                         | ECAR                   | NS                           | NS                           | NS                           | $p = 0.0087$<br><b>-48%</b>  | $p = 0.0020$<br><b>-34%</b>  | NS                           |
| 2-DG, LD50              | Basal OCR              | $p < 0.0001$<br><b>-62%</b>  | $p = 0.0047$<br><b>-38%</b>  | $p < 0.0001$<br><b>-52%</b>  | $p = 0.0020$<br><b>-76%</b>  | NS                           | $p < 0.0001$<br><b>-47%</b>  |
|                         | Maximal OCR            | NS                           | NS                           | $p = 0.0017$<br><b>-27%</b>  | $p < 0.0001$<br><b>-53%</b>  | NS                           | $p = 0.0242$<br><b>-52%</b>  |
|                         | ATP-linked OCR         | $p < 0.0001$<br><b>-63%</b>  | $p = 0.0270$<br><b>-50%</b>  | NS                           | NS                           | NS                           | $p < 0.0001$<br><b>-71%</b>  |
|                         | Proton leak            | $p = 0.0076$<br><b>-65%</b>  | NS                           | $p = 0.0188$<br><b>-35%</b>  | $p = 0.0068$<br><b>-63%</b>  | NS                           | $p = 0.0004$<br><b>+97%</b>  |
|                         | Spare capacity         | $p = 0.0017$<br><b>+86%</b>  | NS                           | NS                           | NS                           | NS                           | NS                           |
|                         | Coupling efficiency    | NS                           | NS                           | NS                           | NS                           | NS                           | $p < 0.0001$<br><b>-57%</b>  |
|                         | ECAR                   | NS                           | $p < 0.0001$<br><b>-37%</b>  | $p = 0.0017$<br><b>-47%</b>  | $p = 0.0014$<br><b>-56%</b>  | $p < 0.0001$<br><b>-60%</b>  | NS                           |
| CCCP, LD25 + 2-DG, LD25 | Basal OCR              | $p < 0.0001$<br><b>-81%</b>  | $p = 0.0066$<br><b>-42%</b>  | $p < 0.0001$<br><b>-83%</b>  | NS                           | $p < 0.0001$<br><b>-70%</b>  | $p < 0.0001$<br><b>-95%</b>  |
|                         | Maximal OCR            | $p < 0.0001$<br><b>-52%</b>  | $p < 0.0001$<br><b>-72%</b>  | $p < 0.0001$<br><b>-89%</b>  | $p < 0.0001$<br><b>-61%</b>  | $p < 0.0001$<br><b>-94%</b>  | $p < 0.0001$<br><b>-96%</b>  |
|                         | ATP-linked OCR         | $p < 0.0001$<br><b>-95%</b>  | $p < 0.0001$<br><b>-88%</b>  | $p < 0.0001$<br><b>-96%</b>  | $p = 0.0103$<br><b>-87%</b>  | $p < 0.0001$<br><b>-100%</b> | $p < 0.0001$<br><b>-101%</b> |

|  |                     |                             |                              |                             |                             |                             |                              |
|--|---------------------|-----------------------------|------------------------------|-----------------------------|-----------------------------|-----------------------------|------------------------------|
|  | Proton leak         | $p = 0.0056$<br><b>-67%</b> | NS                           | $p = 0.0038$<br><b>-42%</b> | NS                          | NS                          | NS                           |
|  | Spare capacity      | NS                          | $p < 0.0001$<br><b>-107%</b> | $p < 0.0001$<br><b>-92%</b> | NS                          | $p < 0.0001$<br><b>-99%</b> | $p < 0.0001$<br><b>-98%</b>  |
|  | Coupling efficiency | $p = 0.0003$<br><b>-72%</b> | $p < 0.0001$<br><b>-80%</b>  | $p < 0.0001$<br><b>-67%</b> | $p = 0.0005$<br><b>-64%</b> | $p = 0.0016$<br><b>-85%</b> | $p < 0.0001$<br><b>-121%</b> |
|  | ECAR                | NS                          | NS                           | $p < 0.0001$<br><b>-58%</b> | NS                          | $p < 0.0001$<br><b>-88%</b> | $p = 0.0095$<br><b>-41%</b>  |

ANOVA with subsequent Dunn's or Fisher LSD test was used. Significant changes ( $p < 0.05$ ) are in bold.
